# Supplementary material for: Extension modules for storage, visualization and querying of genomic, genetic and breeding data in Tripal databases
Source: Database (Oxford). 2017 Dec 9;2017:bax092. doi: 10.1093/database/bax092 (PMC5727400; doi:10.1093/database/bax092)
Supplement: Supplementary Data [file bax092_supp.xlsx]

## Sheet: Headers
db
Name	Required	Definition
db_name	REQ	Name of the db.
url_prefix		Prefix of the URL.
url		URL of the db.
description		Description of the db.
cv
Name	Required	Definition
cv_name	REQ	Name of the control vocabulary or ontology.
definition		Definition of the control vocabulary.
cvterm
Name	Required	Definition
db_name	REQ	Name of the db.
cv_name	REQ	Name of the control vocabulary.
cvterm_name	REQ	Name of the cvterm.
alias		Alias of the cvterm.
accession	REQ	Accession of the cvterm.
definition		Definition of the cvterm.
library
Name	Required	Definition
library_name	REQ	Name of the library (or SNP chip name).
type	REQ	Type of the library ('SNP_chip' for the SNP chip data).
pi		PI of the project.
description		Description of the library.
reference		pub_id for any reference.
contact
Name	Required	Definition
contact_name	REQ	Name of the contact (person, institution, etc).
alias		Any alias of the contact.
type	REQ	Name of the contact - choose one from person, company, institution, lab or organization).
first_name		First name of the person.
last_name		Last name of the person.
institution		Name of the institution the person belongs to.
lab		Name of the lab the person belongs to.
address		Address of the contact.
email		Email of the contact.
phone		Phone number of the contact.
fax		Fax number of the contact.
title		Job title of the person.
country		Country of the contact.
source		Source of the data when the contact information is obtained from other databases.
last_update		Date of the last update.
url		URL of home page.
comments		Any comments of the contact.
keywords		A maximum of 5 keywords that best describe the person's area of work.
dataset
Name	Required	Definition
dataset_name	REQ	Names of the datasets.
type	REQ	Breeding, growing (for cultivar performance data), diversity (for study of genetic diversity) or QTL.
sub_type		To specify whether the markers used were SSR or SNP when the dataset is SSR or SNP genotyping data.
super_dataset		Larger dataset that this sub_dataset belngs to.
trait_descriptor_set		The name of the trait descriptor set that each dataset or breeder uses. This is a required column if a type of a dataset is 'breeding'.
pi		Principal Investigator (eg. breeder, corresponding author of the QTL paper) of the Dataset. It should match a 'contact_name' column in 'Contact' sheet.
crop		Name of the crop for the dataset.
comments		Any comments for the dataset.
reference		pub_id for any reference if the dataset is from publication.
permission		Permission of the dataset. '0' or empty indicates public. Other positive integer indicates private.
description		General description of the dataset (purpose, target, how many crosses, etc).
image
Name	Required	Definition
file_name	REQ	Name of the image file.
image_type	REQ	The type of the image file.
file_legend	REQ	Legend of the image file.
comments	REQ	Any comments for the image file.
descriptor
Name	Required	Definition
trait_descriptor_set		The name of the trait descriptor set. If the database has one trait descriptor set for all public trait evaluation data, it can be specified in the loader.
descriptor_name	REQ	Any trait descriptor that a breeder uses in their own program. These descriptors would be used as column heads the Cross or Phenotype sheets, with a '#' prefix.
alias		Alias of the descriptor.
format	REQ	The format of the descriptor (numerical, categorical, date, text, etc.).
trait_name		crop trait ontology term (no specific protocol or code is involved with trait name) that corresponds to the trait descriptor (name). This should exist in 'Trait' sheet.
data_unit		Unit for the trait descriptor.
definition		Definition of the descriptor.
stock
Name	Required	Definition
stock_name	REQ	Primary ID or name of stock. The most important ID or name (unique and stable at least within the breeding program) should be in this column. For mapping population, follow the naming convention of each database.
germplasm_type	REQ	Select from the three choices (cultivar, breeding_research_material, or wild_unimproved) for an individual germplasm or 'population' for a group of individual.
genus	REQ	Genus to which the stock belongs to.
species	REQ	Species name. Enter 'sp.' to represent one unknown species, 'spp.' to represent multiple unknown species.
grin_id		Accession ID (ACID) in the GRIN database, if it is known.
subspecies		Subspecies name.
description		any description for the stock.
secondary_id		Alternate ID or name that is commonly used to refer to the entry.
paternal_parent		Stock_name for the pollen parent of this entry. This stock_name must also have its own record in this table (it should be entered before being listed as a parent).
maternal_parent		Stock_name for the seed parent of this entry. This stock_name must also have its own record in this table (it should be entered before being listed as a parent).
mutation_parent		Stock_name of the mutaion parent. This stock_name must also have its own record in this table (it should be entered before being listed as a parent).
selfing_parent		Stock_name of the selfing parent. This stock_name must also have its own record in this table (it should be entered before being listed as a parent).
alias		A concatenation of all other less commonly used names or designations for the entry. the aliases. The format is 'Alias type1:Alias1; Alias type2:Alias2'. When there is no specific type for aliases, just write the aliases without the specific type. (eg. Collector:98HT-227; Site:W6 21306; ABC-1; 21306) The format is 'Alias type1:Alias1; Alias type2:Alias2'. When there is no specific type for an ali…
cultivar		Cultivar name if It is a named, cultivated variety.
pedigree		Any additional pedigree information: When the exact parents are not known, or any additional information beyond just parents (eg. Red-fruit sport of Jonathan, Pyrus sp. X Cydonia sp., etc).
origin		The original country for the variety (especially for wild variety).
population_size		Only for type 'population'.
germplasm_center		Stock center or lab where the stock is distributed. Otherwise, provide the details of the contact person in contact column (from whom the material can be obtained) in the 'Contact' sheet.
comments		Any comments on the stock.
image		Image_ID of any associated image (Detailed info in 'Image' sheet.) Multiple images, separated by comma, can be added.
reference		pub_id if any publication is associated with the stock.
site
Name	Required	Definition
site_name	REQ	Curator-assigned name of the site.
latitude		The decimal latitude coordinate of the georeference, using positive and negative sign to indicate N and S, respectively.
longitude		The decimal longitude coordinate of the georeference, using positive and negative sign to indicate E and W, respectively.
altitude		The altitude (elevation) of the location in meters. If the altitude is only known as a range, this is the average, and altitude_dev will hold half of the width of the range.
geodetic_datum		The geodetic system on which the geo-reference coordinates are based. For geo-references measured between 1984 and 2010, this will typically be WGS84.
type		'orchard', 'nursery' or any other types of location.
country		Country where the site belongs to.
state		State where the site belongs to.
region		Region where the site belongs to.
address		The entire address except the country.
comments		Any further comments on the site.
cross
Name	Required	Definition
dataset_name	REQ	Name of the dataset (super-dataset or sub-category) to which the cross belongs. The details of the dataset should be given in the 'Dataset' sheet.
site_name		Site information where the stock for the phenotyping is planted. It should match 'site_name' in the 'Site' sheet.
cross_number	REQ	ID number or name for this specific cross.
mother	REQ	ID name or number for the seed parent for the cross. This ID must also be an entry in the Stock sheet.
mother_location		Location details for the mother of this cross (eg. Plant location, individual stock name, etc).
father	REQ	ID name or number for the pollen parent for the cross. This ID must also be an entry in the Stock sheet.
father_location		Location details for the father of this cross (eg. Plant location, individual stock name, etc).
cross_date		Date for the cross.
progeny
Name	Required	Definition
progeny_name	REQ
alias		Record all the aliases for the cross here. The format is 'Alias type1:Alias1; Alias type2:Alias2'. When there is no specific type for an alias, just write the aliases without the specific type. (eg. Breeder:LG98-942; Institution:4321;2-F04-01).
genus	REQ
species	REQ	When only the genus is known, write 'sp.' in the species.
dataset_name	REQ
cross_number	REQ	Specific ID of a cross that generated the progeny; Must also be found in the Cross table.
description		Any other descriptive data about the selection or seedling.
advanced_to_2nd		Yes if it is advanced to 2nd phase, No otherwise. Leave it empty if the selection decision is yet to be made.
advanced_to_3rd		Yes if it is advanced to 3rd phase, No otherwise.
advanced_to_4th		Yes if it is advanced to 4th phase, No otherwise.
map
Name	Required	Definition
map_name	REQ	Name of the map given by the database curator - follow each database's naming convention.
genus	REQ	Genus of the mapping population.
species	REQ	species of the mapping population. Multiple species can be entered with ';' in between for the mapping populations from inter-specific crosses.
map_unit	REQ	cM, bp, etc.
analysis_method		Analysis method for the mapping.
software		Software used for map construction.
map_type		genetic, physical, cytogenetic, sequence.
population_type		F2, BC1, RIL, etc.
population_size		Size of population.
population_name		Name of the mapping population. It should match 'stock_name' column of the Stock sheet.
source_url		Map data source website.
comments		Any comments for the map.
genome_group		Specific genome groups if available (eg. A, D etc for cotton).
contact		Contact person for the map.
reference		pub_id of the reference.
marker
Name	Required	Definition
marker_name	REQ	Name of the marker.
marker_type		Marker type such as SSR, RFLP, RAPD, STS, SCAR, overgo probe and Isozyme. Refer to the available marker_type page for each database.
genus	REQ	The genus name of the organism from which the marker was developed.
species	REQ	The species name of the organism from which the marker was developed. Enter 'sp.' to represent one unknown species, 'spp.' to represent multiple unknown species.
alias		Other names used for the marker. Multiple aliases, separated by a semicolon (;), can be added.
marker_sequence		Sequence of the marker when available. For SNP, it should be in the format of 5'flanking sequence[A/T] 3'flanking sequence.
gb_id		Associated GenBank ID of the marker or the source of the marker (eg. EST).
dbsnp_id		Associated dbSNP_ID. #ss number should be used.
five_prime_flanking_seq		5' flanking sequence of SNP or Indel.
three_prime_flanking_seq		3' flanking sequence of SNP or Indel.
shared_species		Species names of organisms that have been found to have the same SNP. If there are more than one other species, using ';' to separate.
repeat_motif		Repeat motif for SSR markers.
snp_chip_name		SNP chip name when SNPs belong to a chip (the name should match 'name' in Library sheet.
snp_chip_id		SNP chip ID if there is a specific ID for the specific SNP chip entered in 'SNP_chip_ID'.
restriction_enzyme		Restriction Enzyme used for CAPS marker or other markers that use restriction enzymes.
product_length		The PCR product length from the source species of the marker.
max_length		The maximum product size that have been observed.
min_length		The minimum product size that have been observed.
is_codominant		Yes if the marker is codominant, No otherwise.
pcr_condition		PCR condition for PCR-based markers.
screening_method		Gel type, % etc (eg. 2% agarose) for PCR product visualization and any other screening methods for other types of markers.
monomorphic_population		The name of the mapping population of which the marker was monomorphic.
source_marker_name		The name of the marker from which the marker is generated (STS, SSR or SCAR markers are often generated from other markers). The detail of the source marker should be given in a separate row.
source_description		Whether the marker was developed from the sequence of EST, BAC, cDNA, genomic clone, or WGS.
indel_seq		sequences of indel (eg. ATT).
alleles		Alleles for the SNP marker (eg. A/T).
gel_picture_file_name		File name of the gel picture if available.
gel_picture_legend		Legend of the gel picture if available.
comments		Any comments about the marker.
variety		The variety from which the marker was developed. It should match a 'stock_name' in the Stock sheet.
image		Image_ID of any associated image (Detailed info in 'Image' sheet.) Multiple images, separated by comma, can be added.
contact		Contact person for the marker (Please provide the contact info of these researchers in 'Contact' sheet).
reference		Reference where the marker is originally described (pub_id), Multiple references, separated by comma, can be added.
~idendifier		Special columns (~) : An identifier must be either primer or probe followed by numerical number and name or seq. (e.g.) primer1_seq and primer1_name.
qtl
Name	Required	Definition
dataset_name	REQ	Name of the QTL trait study, the dataset_name should exist in 'dataset_name' column of the 'Dataset' sheet.
qtl_label	REQ	Official unique label of QTL given by the curator. Follow each database's naming convention.
published_symbol		Published Symbol for the QTL.
genus	REQ	The genus of the phenotyping material.
species	REQ	The species of the phenotyping material.
trait_name	REQ	Descriptive name for trait, it should be one of the crop trait ontology and should match a term in 'Trait' sheet.
trait_descriptor_set		Name of the crop trait ontology (entered by the curator who loads the data into the database). If not provided, the site trait ontology will be used.
alias		Other names for the trait, multiple aliases, separated by a semicolon (;) can be added.
r2		Fraction of the total variation explained by the QTLs.
lod		QTL Likelihood of odds.
bayes_factor		Bayes factor.
additive_effect		The average phenotype effect of substituting a q allele for a Q allele.
dominance_effect		The deviation of the heterozygote phenotype from the mean of the homozygotes.
additivity_dominance_ratio		The average phenotype effect of substituting a q allele for a Q allele dominance effect The deviation of the heterozygote phenotype from the mean of the homozygotes.
direction		The direction of additive effect on the phenotype.
colocalized_marker		Marker that are mapped within the interval defined by the QTL. Multiple markers can be added, separated by a semicolon (;).
neighboring_marker		Marker that is mapped in the nearest flanking position outside the interval defined by the QTL. Used to estimate QTL position if no appropriate colocalized markers are found. Multiple markers can be added, separated by a semicolon (;).
screening_method		Any specific method for the phenotypic inspection.
comments		Any comments.
mean		Mean value of the phenotype (if one QTL has multiple mean values based on the condition and/or population, enter them in QTL_trait_Data sheet.
p_value		p-value.
kw_score		kw score.
variance		variance.
population_low_value		Lowest phenotypic value.
population_high_value		Maximum phenotypic value.
reference		pub_id of the QTL paper.
qtl_trait_data
Name	Required	Definition
dataset_name	REQ	name of the QTL trait study, the dataset_name should exist in 'dataset_name' column of the 'Dataset' sheet. A-B-C-D system<br /> A: common name of species (scientific name if not available and genus name if cross-species)<br /> B: trait_name (usually an article report multiple QTL for a trait)<br /> C: Last name of the corresponding author<br /> D: publish year
stock_name	REQ	Name of the population or parent of the population, The name should exist in the 'stock_name' column of the 'Stock' sheet.
genus	REQ	Genus to which the stock belongs to.
species	REQ	Species name. Enter 'sp.' to represent one unknown species, 'spp.' to represent multiple unknown species.
descriptor	REQ	Name of the trait. It should exist in 'trait_name' column of the 'Trait' sheet and 'QTL' sheet.
trait_descriptor_set		The name of the crop trait ontology that is stored in cv table of chado (eg. 'rosaceae_trait_ontology' for GDR, 'cotton_trait_ontology' for cotton). In Main Lab, we develop crop trait ontology for Rosaceae, cool season food legumes, cotton and citrus, and map them to the Plant Trait Ontology. If not provided, the site trait ontology will be used.
site_name		Location/environment where the plant was grown. Site_name should exist in 'site_name' column of the 'Site' sheet. If the phenotypic measurement has bee done in multiple years, create multiple site_code even if it is done in the same location.
mean	REQ	Mean value of the traits for each parent and progeny.
standard_deviation
coefficient_of_variation
skewness
h2
ci_90		Confidence Intervals
comments
reference
mtl
Name	Required	Definition
mtl_name	REQ	Trait locus name given by curators.
genus	REQ	The genus of the phenotyping material.
species	REQ	The species of the phenotyping material.
trait_name		Descriptive name for trait, it should be one of the crop trait ontology and should match a term in 'Trait' sheet.
trait_descriptor_set		Name of the crop trait ontology. A site-wide crop trait ontology can be specified in the loader. If not provided, the site trait ontology will be used.
gb_id		Associated genbank ID if available.
alias		Other names used for the trait. Multiple aliases, separated by comma, can be added.
screening_method		Any specific method for the phenotypic inspection.
description		Desctiption for the trait. The more detail, the better. You can describe the phenotype of the various cultivar and provide the pictures.
published_symbol		Published symbol for the MTL.
colocalized_marker		Molecular marker that colocalizes with the MTL.
neighboring_marker		Molecular marker that is mapped near MTL. Multiple markers can be added, separated by a semicolon (;).
contact		Contact person for the MTL. It should match 'contact_name' in Contact sheet.
image		Image_ID of any associated image (Detailed info in 'Image' sheet.) Multiple images, separated by comma, can be added.
reference		pub_id for the reference that describes MTL. Multiple references, separated by comma, can be added.
map_position
Name	Required	Definition
marker_qtl_mtl	REQ	Name of the marker, QTL or MTL. Please provide the detailr data in 'Marker', 'QTL', or 'MTL' sheet.
locus_name		When a RFLP (eg. AA07) corresponds to more than one locus, the marker name (eg. AA07) is recorded in marker/qtl/mtl column and the specific name for each map position (eg. AA07A, AA07B) is recorded in this 'locus_name' column. Use AA07 as a marker name and the loci names as aliases for the marker name in 'Marker' Sheet. When a MTL is mapped to multiple locations, use the MTL_name in 'MTL' sheet i…
map_name	REQ	Name of the genetic map.
linkage_group	REQ	Name of the linkage group.
linkage_group_order		The order of linkage groups for display. Some maps have linkage groups orders of which are not obvious such as G1V, G1G, G2V, etc.
chr_name		Chromosome name for the linkage group when it\'s known (eg. At1, Dt1, etc in cotton).
chr_number		Chromosome number for the linkage group when it\'s known (eg. chr1, chr26, etc).
chromosome_arm		Name of the chromosome_arm for fish map.
bin_name		Name of the bin if the locus is belongs to a bin. If a molecular marker belongs to multiple bins, list all of them in separate rows.
start		The position of the locus (cM) or start position of the QTL.
stop		The end position of the QTL or marker when a marker corresponds to a region in a genome.
qtl_peak		Center position or the most likely position of the QTL.
comments		Any comments for the map position.
trait
Name	Required	Definition
trait_name	REQ	Trait ontology term for the database or crop. QTLs, MTLs and phenotypic descriptors used in breeding programs can be associated with trait names.
trait_category		The root term of the Plant Tait Ontology for the trait name. Choose one from the list (biochemical trait | growth and development trait | anatomy and morphology trait | quality trait | stature or vigor trait | sterility or fertility trait | stress trait | yield trait).
abbreviation		Abbreviation of the trait ontology term (trait_name).
definition		Definition of trait ontology term (trait_name).
phenotype
Name	Required	Definition
dataset_name	REQ	Name of the phenotyping dataset. It should match a 'dataset_name' column entry in the 'Dataset' sheet.
stock_name	REQ	ID of the stock that has been phenotyped. It should match a 'stock_name' column entry in the 'Stock' sheet.
genus	REQ
species	REQ
sample_id	REQ	The ID of the smallest sample or sub-sample that was tested (Each row should have unique sample_ID). If there is no unique sample ID, users can concatenate a set of columns that gives a unique phenotypic value and those columns become required fields. For example, if a combination of dataset_name, ID, phenotyping_date is unique for the specific phenotype, those three can be concatenated with '_' …
clone_id		ID of a spefic clone if available (eg. individual tree).
evaluator		Person who did the phenotyping. Multiple person can be entered with ';' in between. It should match 'contact_name' of the Contact sheet.
site_name		Site information where the stock for the phenotyping is planted. It should match 'site_name' in the 'Site' sheet.
rep		Any repetition number.
rootstock		Name of tje rootstock if the plant are grafted to a rootstock. It should match an 'stock_name' column of the 'Stock' sheet.
plot		Plot name.
row		Row.
position		Position of the plant.
plant_date		Date of the planting.
data_year		Phenotyping date if only year is known.
evaluation_date		Date of phenotype evaluation.
pick_date		Date of the sample collection if the collection is done on a different date than the phenotype evaluation.
previous_entry		stock ID of the previous entry.
barcode		Barcode
fiber_pkg		Group of samples for phenotyping, can contain samples from multiple germplasm.
storage_time		Time between collection and phenotyping.
storage_regime		The condition of sample storage between the collection and phenotyping.
comments		Any comments for the phenotyping.
#descriptor_name		Special columns (#) : followed by descriptor name.
genoype_snp_long_form
Name	Required	Definition
dataset_name	REQ	Name of the genotyping dataset. It should match a dataset_name in 'Dataset' sheet.
stock_name	REQ	Name of the stock genotyped. It should match an 'stock_name' of the 'Stock' sheet.
genus	REQ	Genus of the stock
species	REQ	Species of the stock
marker	REQ	Name of the marker used for genotyping. It should match a marker_name in the 'Marker' sheet.
genotype	REQ	Type the alleles with '|' in between (e.g. A|T)
genoype_snp_wide_form
Name	Required	Definition
dataset_name	REQ	Name of the genotyping dataset. It should match a dataset_name in 'Dataset' sheet.
stock_name	REQ	Name of the stock genotyped. It should match an 'stock_name' of the 'Stock' sheet.
genus		Genus of the stock
species		Species of the stock
$marker_name		Special columns ($) : followed by marker name

## Sheet: db
*db_name	url_prefix	url	description

## Sheet: cv
*cv_name	definition

## Sheet: cvterm
*db_name	*cv_name	*cvterm_name	alias	*accession	definition

## Sheet: library
*library_name	*type	PI	description	reference

## Sheet: contact
*contact_name	alias	*type	first_name	last_name	institution	lab	address	email	phone	fax	title	country	source	last_update	url	comments	keywords

## Sheet: dataset
*dataset_name	*type	sub_type	super_dataset	trait_descriptor_set	PI	crop	comments	reference	permission	description

## Sheet: image
*file_name	*image_type	*file_legend	*comments

## Sheet: descriptor
trait_descriptor_set	*descriptor_name	alias	*format	trait_name	data_unit	definition

## Sheet: stock
*stock_name	*germplasm_type	*genus	*species	GRIN_ID	subspecies	description	secondary_ID	maternal_parent	paternal_parent	mutation_parent	selfing_parent	alias	cultivar	pedigree	origin	population_size	germplasm_center	comments	image	reference

[truncated: 13 more sheets: site, cross, progeny, map, marker, qtl, qtl_trait_data, mtl, map_position, trait, phenotype, genotype_snp_long_form, genotype_snp_wide_form]
